# Supplementary material for: Enhanced methanol sensing properties of SnO2 microspheres in a composite with Pt nanoparticles
Source: Royal Society of Chemistry journal article supplement (doi:10.1039/c6ra16636a), 2016-01-01
Supplement: c6ra16636a1.pdf [file c6ra16636a1.pdf]

Electronic Supplementary Information (ESI) for RSC Advances

This journal is © The Royal Society of Chemistry 2016

## **Enhanced methanol sensing properties of SnO<sub>2</sub> microspheres composited with Pt nanoparticles**

Yuxiu Li,<sup>a</sup> Dongyang Deng,<sup>a</sup> Nan Chen,<sup>b</sup> Xinxin Xing,<sup>a</sup> Xuechun Xiao,<sup>a,c</sup> Yude Wang<sup>b,c\*</sup>

*a School of Materials Science and Engineering, Yunnan University, 650091 Kunming,  
People's Republic of China*

*b Department of Physics, Yunnan University, 650091 Kunming, People's Republic of China*

*c Yunnan Province Key Lab of Mico-Nano Materials and Technology, Yunnan University,  
650091 Kunming, People's Republic of China*

### **\* Correspondence:**

Prof. Yude Wang (ydwang@ynu.edu.cn), Department of Physics, Yunnan University,  
650091 Kunming, Peoples' Republic of China, Tel: +86-871-65035570, Fax: +86-871-  
65153832.

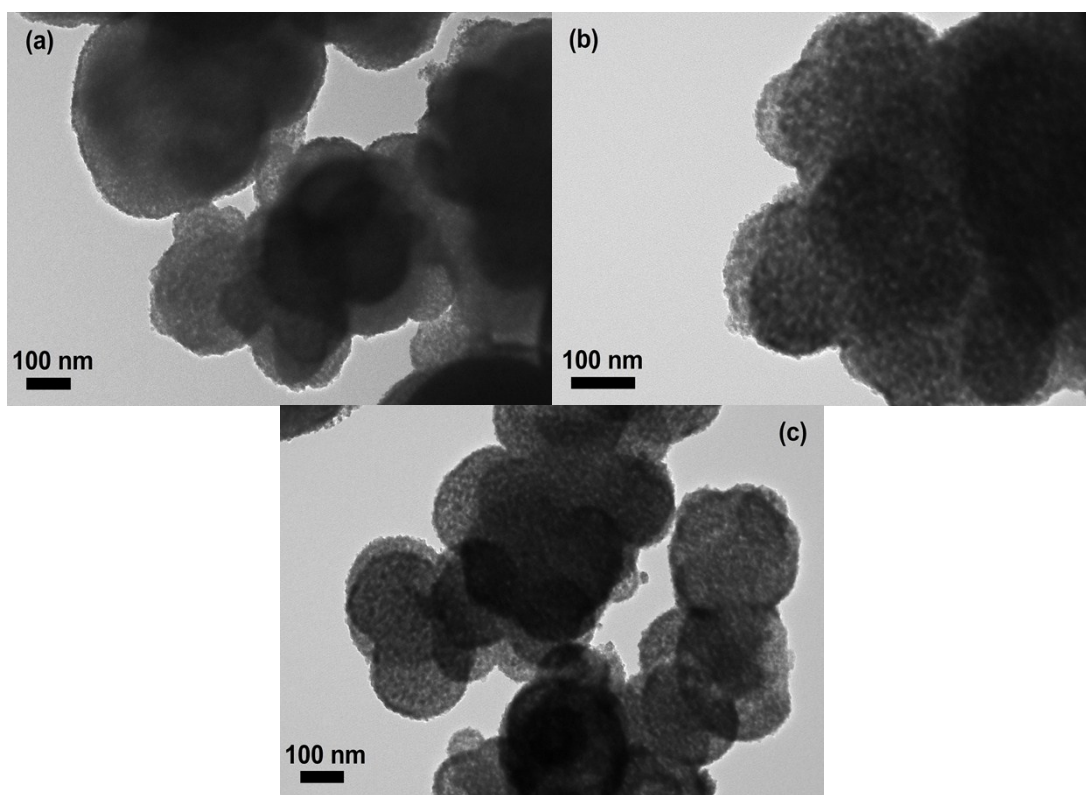

**Figure S1** TEM images of (a) 0.5 mol%, (b) 1.5 mol%, and (c) 2.5 mol% Pt-SnO<sub>2</sub>.

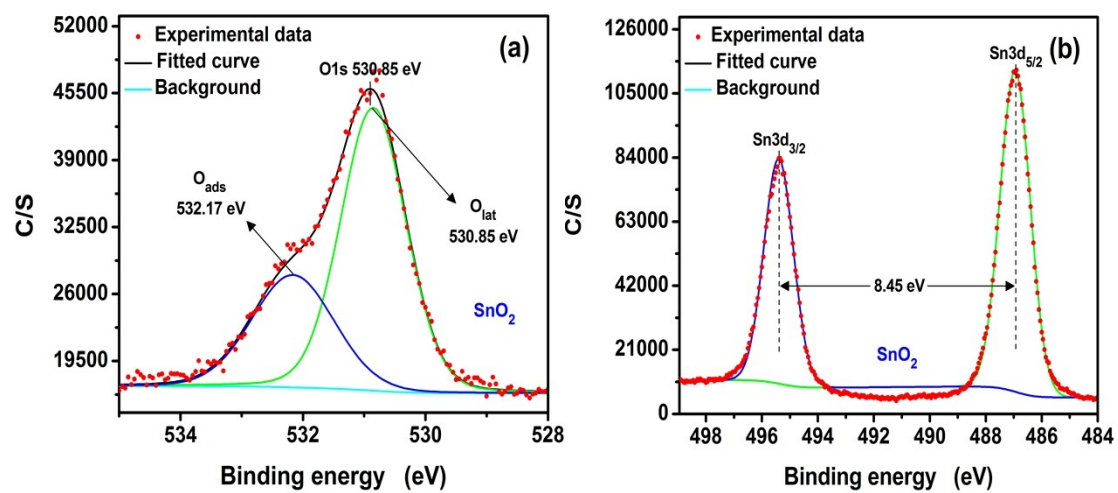

**Figure S2** The high-resolution XPS survey spectra of (a) O 1s and (b) Sn 3d for pristine SnO<sub>2</sub>.
